# Supplementary material
Source: publisher figshare collection journal article supplement (https://sage.figshare.com/ndownloader/files/22882061)
Supplement: Supplementary file 1 [file 22882061]

## Evaluation Form

### *Instructions*

After viewing each excerpt, please circle a number from 1 – 10 that best represents the expressivity of each conductor and ensemble (from “not expressive” to “very expressive”). Use your own paradigm for how you define expressivity.

#### Excerpt 1

How would you rate the expressivity of this conductor?

NOT EXPRESSIVE →→→→→→→→→→→→→→→→→→ VERY EXPRESSIVE

1      2      3      4      5      6      7      8      9      10

How would you rate the expressivity of this ensemble?

NOT EXPRESSIVE →→→→→→→→→→→→→→→→→→ VERY EXPRESSIVE

1      2      3      4      5      6      7      8      9      10

#### Excerpt 2

How would you rate the expressivity of this conductor?

NOT EXPRESSIVE →→→→→→→→→→→→→→→→→→ VERY EXPRESSIVE

1      2      3      4      5      6      7      8      9      10

How would you rate the expressivity of this ensemble?

NOT EXPRESSIVE →→→→→→→→→→→→→→→→→→ VERY EXPRESSIVE

1      2      3      4      5      6      7      8      9      10

Excerpt 3

How would you rate the expressivity of this conductor?

NOT EXPRESSIVE →→→→→→→→→→→→→→→→→→ VERY EXPRESSIVE

1      2      3      4      5      6      7      8      9      10

How would you rate the expressivity of this ensemble?

NOT EXPRESSIVE →→→→→→→→→→→→→→→→→→ VERY EXPRESSIVE

1      2      3      4      5      6      7      8      9      10

**1.** What factors impacted your ratings of the conductors and their ensembles?

**2.** What was the biggest difference between the videos?

3. What do you consider to be the most important factor when assessing the expressivity of a conductor?

Demographic Information:

I identify as:            Male    Female            Other (circle one)

I am an:                Undergraduate            Graduate Student (circle one)

How many years of experience do you have playing or singing in an ensemble?

\_\_\_\_\_

What is your college major? (circle one)

Performance    Music Education        BA        Composition    Nonmusic        Other: \_\_\_\_\_

Have you ever taken (or are currently enrolled in) a basic conducting course?

Yes                No        (circle one)
